# Supplementary material
Source: HighWire-hosted journal article supplement (https://rapm.bmj.com/content/rapm-2020-102315)
Supplement: inline-supplementary-material-2 [file inline-supplementary-material-2.pdf]

## APPENDIX 2.

## QUESTIONNAIRES

The QoR-15 is a multidimensional patient reported item bank. It is used to assess functional recovery. Cronbach reliability is estimated at an alpha of 0.836. (1) The QoR-15 assesses five areas: pain, emotional state, comfort, physical independence and psychological support. (2) A QoR-15 global score (maximum 150 points) of 118 is considered to correlate with a good recovery (3). The short form of the Brief Pain Inventory (BPI) questionnaire was designed to measure pain and interference from pain with the patient's physical and emotional functionality. (4) Cronbach reliability ranges from an alpha of 0.78 to 0.96. Complete relief is scored with a 0, and no relief corresponds to a score of 10. A lower global BPI score corresponds to less interference and less pain. There were two Patient-Related Outcomes Measurement Information System (PROMIS) used: the pain interference and depression item banks. These have been developed using item response theory, and have been validated in the orthopaedic population. (4-6)

The PROMIS pain interference questionnaire assesses the impact of pain on general enjoyment, concentration, daily activities, recreational enjoyment, tasks, and socialization. Cronbach reliability is estimated at an alpha of 0.99.(7) A higher score corresponds to a greater degree of interference.

The PROMIS depression item bank has been designed to assess emotional distress from depressive symptoms. Cronbach reliability ranges from an alpha of 0.88 to 1.0.(8) A higher score corresponds to more depressive symptomology.

## Appendix 2. References

1. Kleif J, Waage J, Christensen KB, Gogenur I. Systematic review of the QoR-15 score, a patient-reported outcome measure measuring quality of recovery after surgery and anaesthesia. *Br J Anaesth*. 2018;120(1):28-36.
2. Stark PA, Myles PS, Burke JA. Development and psychometric evaluation of a postoperative quality of recovery score: the QoR-15. *Anesthesiology*. 2013;118(6):1332-40.
3. Keller S, Bann CM, Dodd SL, Schein J, Mendoza TR, Cleeland CS. Validity of the brief pain inventory for use in documenting the outcomes of patients with noncancer pain. *Clin J Pain*. 2004;20(5):309-18.
4. Cella D, Yount S, Rothrock N, Gershon R, Cook K, Reeve B, et al. The Patient-Reported Outcomes Measurement Information System (PROMIS): progress of an NIH Roadmap cooperative group during its first two years. *Med Care*. 2007;45(5 Suppl 1):S3-S11.
5. DeWalt DA, Rothrock N, Yount S, Stone AA, Group PC. Evaluation of item candidates: the PROMIS qualitative item review. *Med Care*. 2007;45(5 Suppl 1):S12-21.
6. Wright MA, Adelani M, Dy C, O'Keefe R, Calfee RP. What is the Impact of Social Deprivation on Physical and Mental Health in Orthopaedic Patients? *Clin Orthop Relat Res*. 2019;477(8):1825-35.
7. Amtmann D, Cook KF, Jensen MP, Chen WH, Choi S, Revicki D, et al. Development of a PROMIS item bank to measure pain interference. *Pain*. 2010;150(1):173-82.
8. Marrie RA, Zhang L, Lix LM, Graff LA, Walker JR, Fisk JD, et al. The validity and reliability of screening measures for depression and anxiety disorders in multiple sclerosis. *Mult Scler Relat Disord*. 2018;20:9-15.
